# Supplementary material
Source: PubMed Central journal article supplement (PMC7106164)
Supplement: mmc2.pdf [file mmc2.pdf]

**Supplementary Table S1: Configuration of BD Influx™ and settings relevant to nano-particle analysis**

| <b>Feature</b>                            | <b>Technical details</b>                                                            |
|-------------------------------------------|-------------------------------------------------------------------------------------|
| 488 nm laser                              | Sapphire (Coherent, USA), 190 mW (95% of its maximum)                               |
| 561 nm laser                              | Jive (Cobolt, Sweden), 100 mW                                                       |
| <i>Scatter optics for small particles</i> |                                                                                     |
| 20X microscope objective                  | Mitutoyo (Japan), Long distance N.A. 0.42                                           |
| Blocker bar in front of the FSC lens      | 5 mm width, allowing to collect scatter at an angle between 14-25 degrees           |
| Pinhole behind FSC lens                   | 0.7 mm                                                                              |
| PMT on each scatter position              | Type R3896, Hamamatsu (Japan)                                                       |
| <br>                                      |                                                                                     |
| <b>Parameter</b>                          | <b>Value</b>                                                                        |
| Nozzle size                               | 140 micrometer                                                                      |
| Sheath pressure                           | 5 PSI                                                                               |
| Sample pressure                           | 4.2 PSI                                                                             |
| Flow rate                                 | 20.8 micro liter per minute                                                         |
| Trigger signal                            | On fluorescence (528/38)                                                            |
| Threshold FL1                             | Threshold level was set such that 6 events per second were observed in filtered PBS |
| PMT filter sets and positions             | 488/10 FSC detector<br>488/10 SSC detector<br>528/38 pinhole 1<br>585/42 pinhole 3  |
| Others                                    | - Measure with closed blinds<br>- Standard 0.2 micron filter for sheath fluid       |
