# Supplementary material
Source: PubMed Central journal article supplement (PMC7106164)

Wauben, M.H.M. - Supplementary Figure 1

A

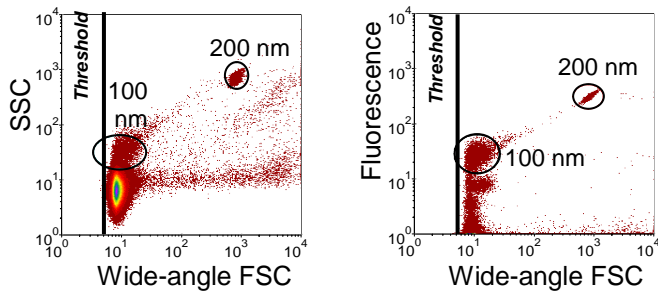

B

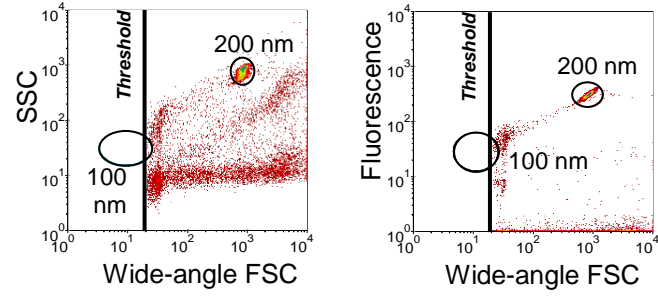

C

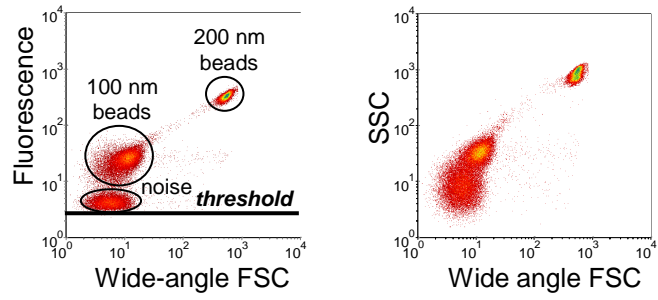

D

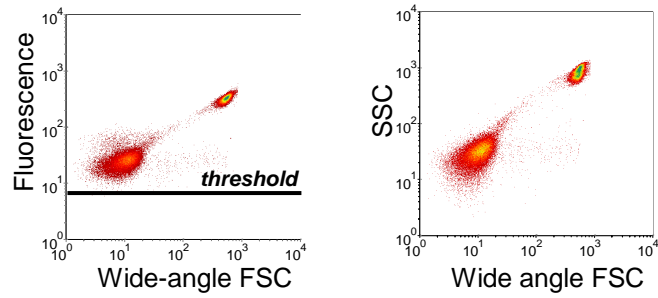

E

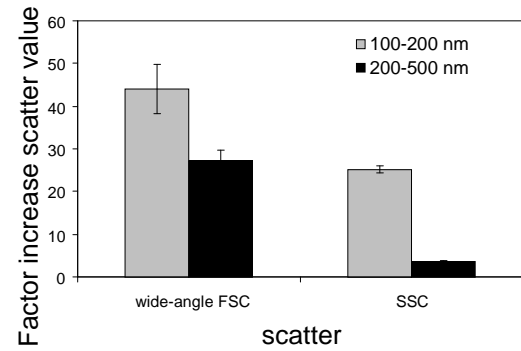

Supplement: mmc3.pdf [file mmc3.pdf]
